# Supplementary material for: Enzymatic synthesis of 2,5-furandicarboxylic acid-based semi-aromatic polyamides: enzymatic polymerization kinetics, effect of diamine chain length and thermal properties
Source: Royal Society of Chemistry journal article supplement (doi:10.1039/c6ra14585j), 2016-01-01
Supplement: c6ra14585j1.pdf [file c6ra14585j1.pdf]

# Enzymatic synthesis of 2,5-furandicarboxylic acid-based semi-aromatic polyamides: enzymatic polymerization kinetics, effect of diamine chain length and thermal properties

Yi Jiang, Dina Maniar, Albert J. J. Woortman, and Katja Loos

## Supporting Information

**Table S1.** Molecular weights and degrees of polymerization of the crude poly(octamethylene furanamide) (PA8F) from the one-stage enzymatic polymerization of DMFDCA (dimethyl 2,5-furandicarboxylate) and 1,8-ODA (1,8-octanediamine) at 90 °C in toluene

| Polymerization Time | $\bar{M}_n$ (g/mol) <sup>a</sup> | $\bar{M}_w$ (g/mol) <sup>a</sup> | $\bar{M}_p$ (g/mol) <sup>a</sup> | $\overline{DP}_n$ <sup>b</sup> | $\overline{DP}_w$ <sup>b</sup> | $\overline{DP}_p$ <sup>b</sup> |
|---------------------|----------------------------------|----------------------------------|----------------------------------|--------------------------------|--------------------------------|--------------------------------|
| 2 h                 | 500                              | 600                              | 500                              | 4                              | 5                              | 4                              |
| 6 h                 | 600                              | 900                              | 600                              | 5                              | 7                              | 5                              |
| 9 h                 | 800                              | 1700                             | 1000                             | 6                              | 13                             | 8                              |
| 24 h                | 1800                             | 6400                             | 5600                             | 14                             | 48                             | 42                             |
| 35 h                | 1800                             | 8600                             | 5500                             | 14                             | 65                             | 42                             |
| 72 h                | 2000                             | 10700                            | 6600                             | 15                             | 81                             | 50                             |

<sup>a</sup>  $\bar{M}_n$  (number-average molecular weight),  $\bar{M}_w$  (weight-average molecular weight) and  $\bar{M}_p$  (peak molecular weight) were determined by SEC (conventional calibration), using LiBr/DMSO as the eluent; <sup>b</sup>  $\overline{DP}_n$  (number-average degree of polymerization) =  $2 \times \bar{M}_n/M_{\text{repeating unit}}$ ,  $\overline{DP}_w$  (weight-average degree of polymerization) =  $2 \times \bar{M}_w/M_{\text{repeating unit}}$ , and  $\overline{DP}_p$  (peak degree of polymerization, the major retention volume) =  $2 \times \bar{M}_p/M_{\text{repeating unit}}$ , where  $M_{\text{repeating unit}}$  is the molecular mass of the repeating units.

**Table S2.** Cumulative weight fractions of the crude PA8F from the one-stage enzymatic polymerization of DMFDCA and 1,8-ODA at 90 °C in toluene

| Retention Volume (mL) | Molecular Weight (g/mol) <sup>a</sup> | $\bar{D}P$ <sup>b</sup> | Cumulative Weight Fraction (%) <sup>c</sup> |      |      |      |      |      |
|-----------------------|---------------------------------------|-------------------------|---------------------------------------------|------|------|------|------|------|
|                       |                                       |                         | 2 h                                         | 6 h  | 9 h  | 24 h | 35 h | 72 h |
| 33.2 – 34.2           | 200 - 500                             | 2 - 4                   | 37.9                                        | 28.1 | 16.0 | 5.2  | 4.8  | 5.1  |
| 32.5 - 33.2           | 500 - 800                             | 4 - 6                   | 54.2                                        | 50.7 | 24.3 | 7.1  | 6.7  | 6.5  |
| 31.1 – 32.5           | 800 - 2100                            | 6 - 16                  | 7.9                                         | 14.2 | 36.1 | 16.8 | 16.2 | 15.2 |
| 29.4 – 31.1           | 2100 - 5500                           | 16 - 42                 | 0.0                                         | 7.0  | 20.4 | 31.1 | 28.4 | 25.2 |
| 24.0 – 29.4           | 5500 – 67200                          | 42 - 509                | 0.0                                         | 0.0  | 3.2  | 39.8 | 43.5 | 42.9 |
| 22.0 – 24.0           | 67200 - 178400                        | 509 - 1350              | 0.0                                         | 0.0  | 0.0  | 0.0  | 0.4  | 5.1  |
| < 31.1                | < 2100                                | < 16                    | 100.0                                       | 93.2 | 76.5 | 29.3 | 27.8 | 26.8 |
| < 29.4                | < 5500                                | < 42                    | 100.0                                       | 100  | 96.8 | 60.2 | 56.1 | 52.0 |
| ≥ 29.4                | ≥ 5500                                | ≥ 42                    | 0.0                                         | 0.0  | 3.2  | 39.8 | 43.9 | 48.0 |

<sup>a</sup> Determined by the calibration curve generated by pullulan standards; <sup>b</sup>  $\bar{D}P = 2 \times \text{Molecular Weight} / M_{\text{repeating unit}}$ , where  $M_{\text{repeating unit}}$  is the molecular mass of the repeating unit octamethylene furanamide; <sup>c</sup> Determined by SEC based on the refractive index signal.

**Table S3.** Results summary: N435-catalyzed polycondensation of DMFDCA and various aliphatic diamines using a one-stage method at 90 °C in toluene

| Polyamide | x <sup>a</sup> | NMR <sup>b</sup>    |                     | SEC <sup>d</sup>    |                           |                                     | Isolation Yield (%) <sup>g</sup> |
|-----------|----------------|---------------------|---------------------|---------------------|---------------------------|-------------------------------------|----------------------------------|
|           |                | $\bar{M}_n$ (g/mol) | $\bar{M}_n$ (g/mol) | $\bar{M}_w$ (g/mol) | $D\bar{P}_w$ <sup>f</sup> | $\bar{D}$ ( $\bar{M}_w/\bar{M}_n$ ) |                                  |
| PA4F      | 4              | 3030 <sup>c</sup>   | 12300               | 15800               | 152                       | 1.30                                | 7                                |
| PA6F      | 6              | 3316                | 13400               | 20600               | 174                       | 1.50                                | 23                               |
| PA8F      | 8              | 7800                | 13400 <sup>e</sup>  | 48300 <sup>e</sup>  | 365 <sup>e</sup>          | 3.60 <sup>e</sup>                   | 53                               |
| PA10F     | 10             | 4209                | 13400               | 21200               | 145                       | 1.60                                | 35                               |
| PA12F     | 12             | 2062                | 9500                | 19900               | 124                       | 2.10                                | 16                               |

<sup>a</sup> X is the number of the methylene units in the diamine segments, which defines the chain length of the tested aliphatic diamines; <sup>b</sup>  $\bar{M}_n$  (number-average molecular weight) was determined by <sup>1</sup>H NMR according to the method established in our previous report (see *Biomacromolecules* **2015**, 16, (11), 3674-3685); <sup>c</sup>  $\bar{M}_n$  was calculated from <sup>1</sup>H NMR with the assumption that all the obtained PA4F was terminated by amino groups at the one end and methoxyl groups at the other end; <sup>d</sup>  $\bar{M}_n$ ,  $\bar{M}_w$  (weight-average molecular weight), and  $\bar{D}$  (dispersity,  $\bar{M}_w/\bar{M}_n$ ) were determined by SEC (conventional calibration) using LiBr/DMF (0.01M) as the eluent; <sup>e</sup>  $\bar{M}_n$ ,  $\bar{M}_w$  and  $\bar{D}$  of PA8F were determined by SEC (universal calibration) using LiBr/DMSO as the eluent; <sup>f</sup>  $D\bar{P}_w = 2 \times \bar{M}_w/M_{repeating\ unit}$ , where  $M_{repeating\ unit}$  is the molecular mass of the repeating units; <sup>g</sup> Yield of purified products.

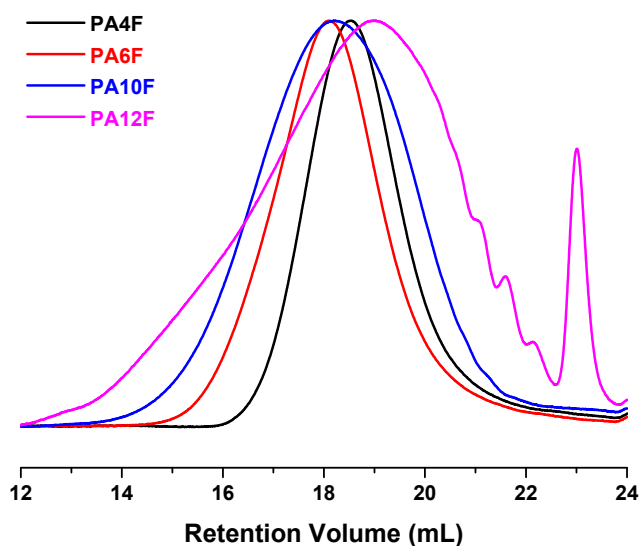

**Figure S1.** SEC elution curves of the obtained FDCA-based semi-aromatic polyamides (PAXF) produced via the one-stage enzymatic polymerization in toluene at 90 °C. The eluent was DMF with LiBr. X presents the methylene units in the diamine segments.

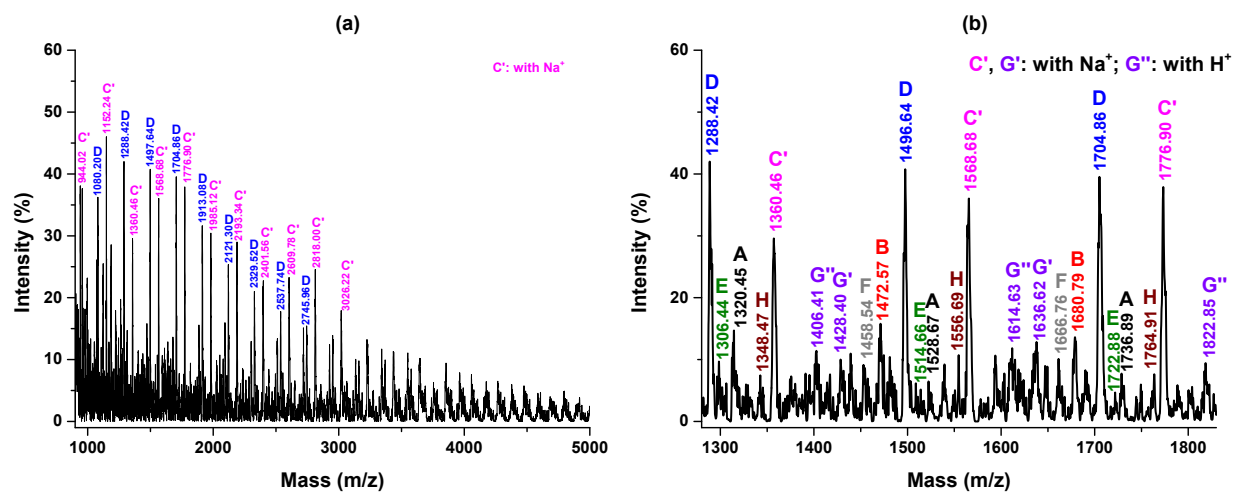

**Figure S2.** MALDI-ToF MS spectrum of the obtained poly(butylene furanamide) (PA4F) with detailed peak interpretation. PA4F was produced via the one-stage enzymatic polymerization of DMFDCA and 1,4-butanediamine (1,4-BDA) in toluene at 90 °C.

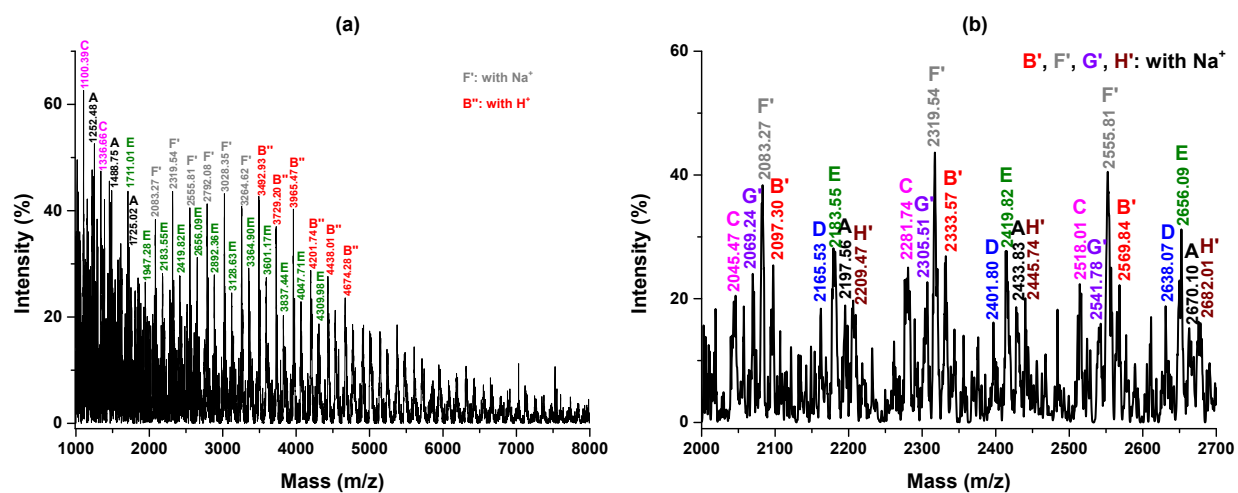

**Figure S3.** MALDI-ToF MS spectrum of the obtained poly(hexamethylene furanamide) (PA6F) with detailed peak interpretation. PA6F was produced via the one-stage enzymatic polymerization of DMFDCA and 1,6-hexanediamine (1,6-HDA) in toluene at 90 °C.

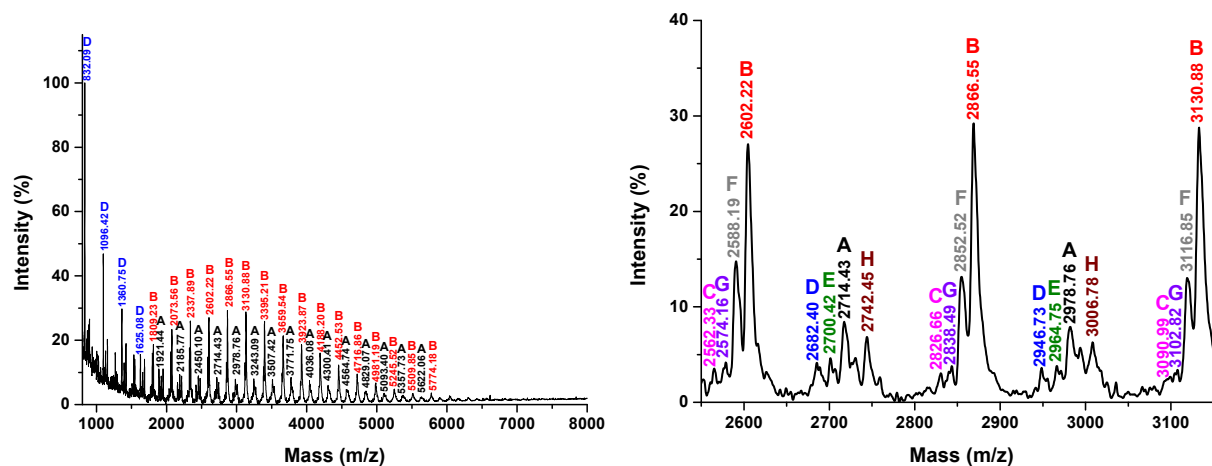

**Figure S4.** MALDI-ToF MS spectrum of poly(octamethylene furanamide) (PA8F) with detailed peak interpretation. PA8F was produced via the one-stage enzymatic polymerization of DMFDCA and 1,8-ODA in toluene at 90 °C.

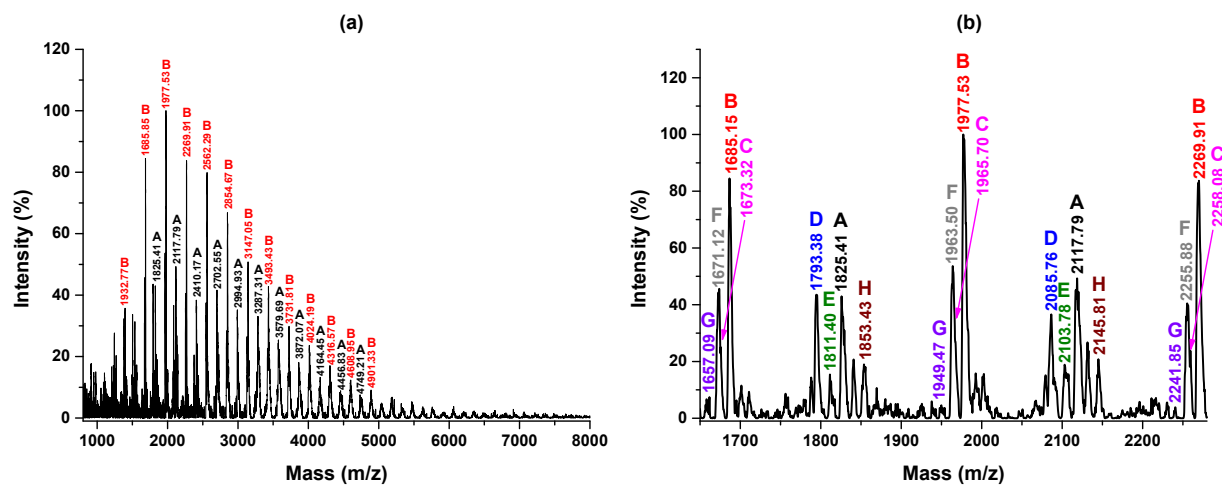

**Figure S5.** MALDI-ToF MS spectrum of the obtained poly(decamethylene furanamide) (PA10F) with detailed peak interpretation. PA10F was produced via the one-stage enzymatic polymerization of DMFDCA and 1,10-decanediamine (1,10-DDA) in toluene at 90 °C.

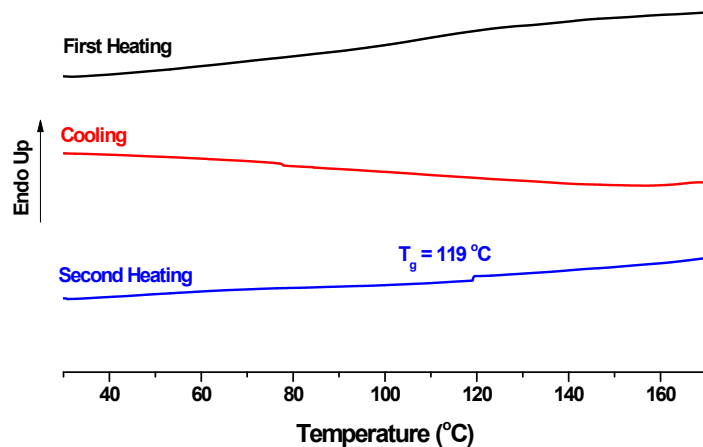

**Figure S6.** DSC curves of the obtained PA4F. PA4F ( $\bar{M}_n = 12300\text{ g/mol}$ ,  $\bar{M}_w = 15800\text{ g/mol}$ ) was produced via the one-stage enzymatic polymerization of DMFDCA and 1,4-BDA in toluene at  $90\text{ }^\circ\text{C}$ .

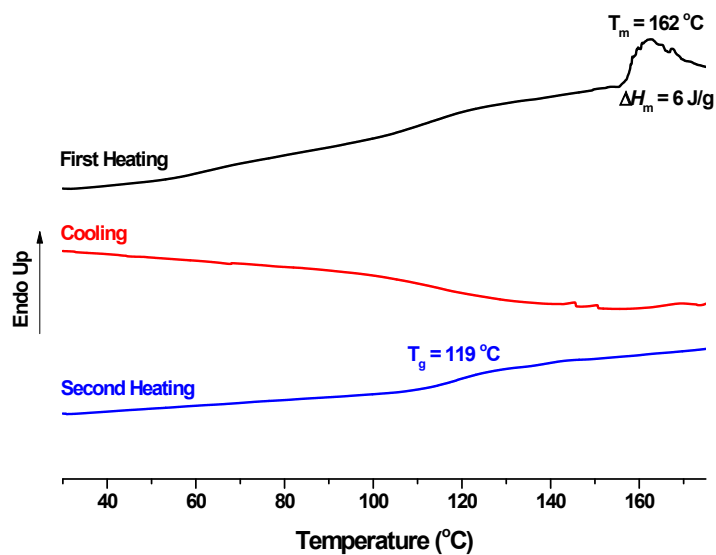

**Figure S7.** DSC curves of the obtained PA6F. PA6F ( $\bar{M}_n = 13400\text{ g/mol}$ ,  $\bar{M}_w = 20600\text{ g/mol}$ ) was produced via the one-stage enzymatic polymerization of DMFDCA and 1,6-HDA in toluene at  $90\text{ }^\circ\text{C}$ .

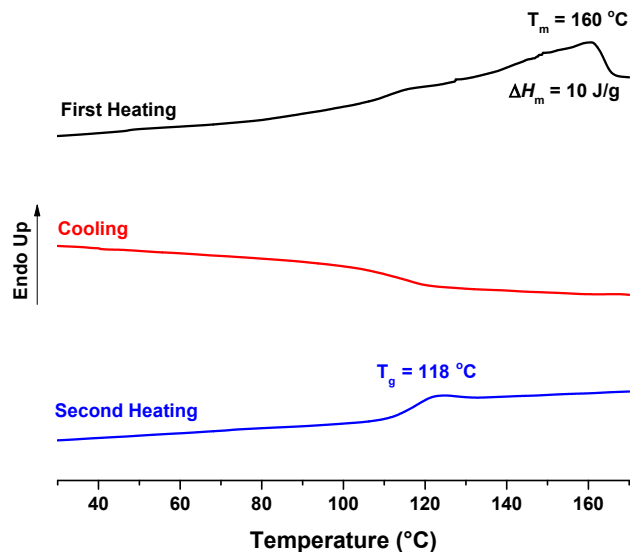

**Figure S8.** DSC curves of the obtained PA8F. PA8F ( $\bar{M}_n = 13400\text{ g/mol}$ ,  $\bar{M}_w = 48300\text{ g/mol}$ ) was produced via the one-stage enzymatic polymerization of DMFDCA and 1,8-ODA in toluene at  $90\text{ °C}$ .

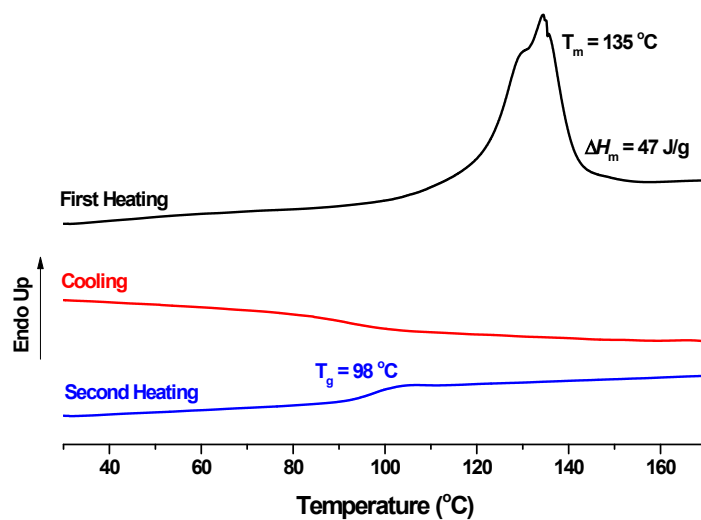

**Figure S9.** DSC curves of the obtained PA10F. PA10F ( $\bar{M}_n = 13400\text{ g/mol}$ ,  $\bar{M}_w = 21200\text{ g/mol}$ ) was produced via the one-stage enzymatic polymerization of DMFDCA and 1,10-DDA in toluene at  $90\text{ °C}$ .
